# Supplementary material for: Outcome of gastric emptying and gastrointestinal symptoms after liver transplantation for hereditary transthyretin amyloidosis
Source: Springer Nature journal article supplement (doi:10.1186/s12876-015-0284-4), 2015-04-24
Supplement: MOESM1 [file 9738194]

Datum \_\_\_\_\_

## **FRÅGOR OM SKELLEFTESJUKAN (FAP)**

Markera genom att fylla i den siffra Du tycker motsvarar graden av Dina besvär just nu.

| 0         | 1, 2, 3              | 4, 5, 6   | 7, 8, 9                     | 10         |
|-----------|----------------------|-----------|-----------------------------|------------|
| Inte alls | Ganska ringa<br>Lite | Betydande | Stark<br>Påtaglig<br>Mycket | Outhärdlig |

### **Kroppssymptom**

|                                        |       |
|----------------------------------------|-------|
| Illamående                             | _____ |
| Kräkningar                             | _____ |
| Diarré                                 | _____ |
| Förstoppning                           | _____ |
| Problem att hålla avföringen           | _____ |
| Matleda                                | _____ |
| Viktninskning                          | _____ |
| Yrsel                                  | _____ |
| Svinningsbesvär                        | _____ |
| Allmän trötthets- eller matthetskänsla | _____ |
| Blåstömningsbesvär                     | _____ |
| Impotens                               | _____ |
| Synbesvär/ögonbesvär                   | _____ |
| Smärta i armar                         | _____ |
| Smärta i ben                           | _____ |
| Känselförlust i armar                  | _____ |
| Känselförlust i ben                    | _____ |
| Nedsatt muskelkraft i armar            | _____ |
| Nedsatt muskelkraft i ben              | _____ |
| Gångsvårigheter                        | _____ |
| Gripsvårigheter                        | _____ |

Är det något som fattas i symptombilden som Du besväras av?  
Ange i så fall vad och i vilken grad: \_\_\_\_\_

\_\_\_\_\_

\_\_\_\_\_

Markera genom att fylla i den siffra Du tycker motsvarar graden av Dina besvär just nu.

| 0         | 1, 2, 3              | 4, 5, 6   | 7, 8, 9                     | 10         |
|-----------|----------------------|-----------|-----------------------------|------------|
| Inte alls | Ganska ringa<br>Lite | Betydande | Stark<br>Påtaglig<br>Mycket | Outhärdlig |

### Psykiska symptom

|                             |       |
|-----------------------------|-------|
| Oro/ångest                  | _____ |
| Stress/spänning             | _____ |
| Rastlöshet                  | _____ |
| Irritation                  | _____ |
| Oföretagsamhet              | _____ |
| Nedstämdhet                 | _____ |
| Likgiltighet                | _____ |
| Livsleda                    | _____ |
| Sömnsvårigheter             | _____ |
| Försämrad uppmärksamhet     | _____ |
| Försämrad koncentration     | _____ |
| Försämrat minne             | _____ |
| Försämrad bedömningsförmåga | _____ |
| Kommunikationsbesvär        | _____ |

Är det något som fattas i symptombilden som Du besväras av?

Ange i så fall vad och i vilken grad: \_\_\_\_\_

---

---
