# Supplementary material for: Outcome of gastric emptying and gastrointestinal symptoms after liver transplantation for hereditary transthyretin amyloidosis
Source: Springer Nature journal article supplement (doi:10.1186/s12876-015-0284-4), 2015-04-24
Supplement: MOESM2 [file 9738194]

Date \_\_\_\_\_

## **FAP SYMPTOM QUESTIONNAIRE**

Answer each item by filling out the figure that best matches your current disease state.

| 0           | 1, 2, 3       | 4, 5, 6               | 7, 8, 9         | 10                  |
|-------------|---------------|-----------------------|-----------------|---------------------|
| No symptoms | Mild symptoms | Considerable symptoms | Severe symptoms | Unbearable symptoms |

### **Bodily symptoms**

- Nausea \_\_\_\_\_
- Vomiting \_\_\_\_\_
- Diarrhea \_\_\_\_\_
- Constipation \_\_\_\_\_
- Accidental bowel leakage \_\_\_\_\_
- Loss of appetite \_\_\_\_\_
- Weight loss \_\_\_\_\_
- Dizziness \_\_\_\_\_
- Fainting \_\_\_\_\_
- Fatigue \_\_\_\_\_
- Bladder emptying problems \_\_\_\_\_
- Impotence \_\_\_\_\_
- Visual disturbances \_\_\_\_\_
- Arm pain \_\_\_\_\_
- Leg pain \_\_\_\_\_
- Sensory loss in the arms \_\_\_\_\_
- Sensory loss in the legs \_\_\_\_\_
- Reduced arm muscle strength \_\_\_\_\_
- Reduced leg muscle strength \_\_\_\_\_
- Difficulty walking \_\_\_\_\_
- Difficulty gripping \_\_\_\_\_

Do you suffer from any additional symptom?

If so, please state and grade the symptom here: \_\_\_\_\_

---

---

Answer each item by filling out the figure that best matches your current disease state.

|             |               |                       |                 |                     |
|-------------|---------------|-----------------------|-----------------|---------------------|
| 0           | 1, 2, 3       | 4, 5, 6               | 7, 8, 9         | 10                  |
| No symptoms | Mild symptoms | Considerable symptoms | Severe symptoms | Unbearable symptoms |

**Mental symptoms**

- Anxiety \_\_\_\_\_
- Stress/tension \_\_\_\_\_
- Restlessness \_\_\_\_\_
- Irritability \_\_\_\_\_
- Shiftlessness \_\_\_\_\_
- Depression \_\_\_\_\_
- Indifference \_\_\_\_\_
- Tiredness of life \_\_\_\_\_
- Sleep disturbances \_\_\_\_\_
- Attention problems \_\_\_\_\_
- Concentration difficulties \_\_\_\_\_
- Memory problems \_\_\_\_\_
- Impaired judgement \_\_\_\_\_
- Communication difficulties \_\_\_\_\_

Do you suffer from any additional symptom?  
If so, please state and grade the symptom here: \_\_\_\_\_

---

---
